# Supplementary material
Source: PubMed Central journal article supplement (PMC8785730)
Supplement: 6510_2_supp_57716_qj51dm.pdf [file 6510_2_supp_57716_qj51dm.pdf]

**Supplemental Material for  
Kidney Biomarkers and Major Adverse Kidney Events in Critically Ill Patients  
Flannery AH, Bosler K, Ortiz-Soriano V, Gianella F, Prado V, Lambert J, Toto RD,  
Moe OW, Neyra JA**

**eTable 1. Major Adverse Kidney Events at 90 Days**

**eTable 2. Major Adverse Kidney Events at Six Months**

**eTable 3. Major Adverse Kidney Events at One Year**

**eTable 1. Major Adverse Kidney Events at 90 Days**

| Kidney Biomarker                      | MAKE at 90 Days<br>(n=47) | No MAKE at 90 Days<br>(n=35) | p-value |
|---------------------------------------|---------------------------|------------------------------|---------|
| Serum NGAL Time 1 (ng/ml)             | 483 (244-1307)            | 189 (119-304)                | <0.001  |
| Serum NGAL Time 2 (ng/ml)             | 441 (238-804) (n=21)      | 157 (133-437) (n=7)          | 0.062   |
| Serum NGAL Time 3 (ng/ml)             | 237 (200-886) (n=12)      | 238 (106-516) (n=5)          | 0.574   |
| Urinary NGAL/Ucr Time 1 (ng/ml)       | 850 (140-3649) (n=40)     | 34 (10-99)                   | <0.001  |
| Urinary NGAL/Ucr Time 2 (ng/ml)       | 553 (75-1322) (n=18)      | 109 (35-2496) (n=7)          | 0.790   |
| Urinary NGAL/Ucr Time 3 (ng/ml)       | 259 (40-891) (n=10)       | 30 (15-561) (n=5)            | 0.165   |
| Serum Cystatin C Time 1 (ng/ml)       | 2018 (837-3002)           | 713 (574-1024)               | <0.001  |
| Serum Cystatin C Time 2 (ng/ml)       | 1369 (1100-2554) (n=21)   | 962 (667-1403) (n=7)         | 0.036   |
| Serum Cystatin C Time 3 (ng/ml)       | 1668 (1201-2595) (n=12)   | 1445 (813-3124) (n=4)        | 0.599   |
| Urinary Cystatin C/Ucr Time 1 (ng/ml) | 339 (48-1529) (n=40)      | 68 (17-837)                  | 0.047   |
| Urinary Cystatin C/Ucr Time 2 (ng/ml) | 370 (75-1462) (n=18)      | 147 (62-776) (n=7)           | 0.574   |
| Urinary Cystatin C/Ucr Time 3 (ng/ml) | 69 (46-820) (n=9)         | 116 (55-319) (n=5)           | 0.947   |
| Urinary KIM-1/Ucr Time 1 (ng/ml)      | 5.2 (2.5-13.3) (n=40)     | 2.3 (1.4-6.1)                | 0.014   |
| Urinary KIM-1/Ucr Time 2 (ng/ml)      | 4.6 (2.8-7.7) (n=18)      | 5.2 (1.2-6.8) (n=7)          | 0.701   |
| Urinary KIM-1/Ucr Time 3 (ng/ml)      | 2.4 (1.8-4.9) (n=10)      | 3 (1.9-4.3) (n=5)            | 0.953   |

**eTable 2. Major Adverse Kidney Events at Six Months**

| Kidney Biomarker                      | MAKE at 6 months<br>(n=45) | No MAKE at 6 months<br>(n=34) | p-value |
|---------------------------------------|----------------------------|-------------------------------|---------|
| Serum NGAL Time 1 (ng/ml)             | 474 (229-1203)             | 193 (129-312)                 | <0.001  |
| Serum NGAL Time 2 (ng/ml)             | 452 (272-1018) (n=17)      | 158 (114-304) (n=8)           | 0.011   |
| Serum NGAL Time 3 (ng/ml)             | 328 (226-1277) (n=9)       | 150 (108-238) (n=7)           | 0.023   |
| Urinary NGAL/Ucr Time 1 (ng/ml)       | 510 (107-3277) (n=39)      | 33 (9-150) (n=33)             | <0.001  |
| Urinary NGAL/Ucr Time 2 (ng/ml)       | 494 (66-2009) (n=14)       | 343 (46-1126) (n=8)           | 0.664   |
| Urinary NGAL/Ucr Time 3 (ng/ml)       | 416 (23-904) (n=7)         | 42 (19-70) (n=7)              | 0.209   |
| Serum Cystatin C Time 1 (ng/ml)       | 2018 (830-3038)            | 710 (571-999)                 | <0.001  |
| Serum Cystatin C Time 2 (ng/ml)       | 1506 (1042-2677) (n=17)    | 1035 (709-1340) (n=8)         | 0.043   |
| Serum Cystatin C Time 3 (ng/ml)       | 2380 (1088-2708) (n=9)     | 1205 (955-1479) (n=6)         | 0.088   |
| Urinary Cystatin C/Ucr Time 1 (ng/ml) | 398 (48-1561) (n=39)       | 57 (13-650) (n=33)            | 0.036   |
| Urinary Cystatin C/Ucr Time 2 (ng/ml) | 503 (23-1462) (n=14)       | 174 (79-568) (n=8)            | 0.764   |
| Urinary Cystatin C/Ucr Time 3 (ng/ml) | 437 (49-1477) (n=6)        | 68 (49-116) (n=7)             | 0.181   |
| Urinary KIM-1/Ucr Time 1 (ng/ml)      | 5.1 (2.5-13.3) (n=39)      | 2.1 (1.1-5.8) (n=33)          | 0.005   |
| Urinary KIM-1/Ucr Time 2 (ng/ml)      | 5.8 (2.8-7.7) (n=14)       | 4.3 (1.6-6.4) (n=8)           | 0.525   |
| Urinary KIM-1/Ucr Time 3 (ng/ml)      | 4.5 (2.0-6.4) (n=7)        | 2.3 (1.8-3.8) (n=7)           | 0.209   |

**eTable 3. Major Adverse Kidney Events at One Year**

| Kidney Biomarker                      | MAKE at 1 year (n=48)   | No MAKE at 1 year (n=27) | p-value |
|---------------------------------------|-------------------------|--------------------------|---------|
| Serum NGAL Time 1 (ng/ml)             | 426 (188-927)           | 192 (133-279)            | 0.001   |
| Serum NGAL Time 2 (ng/ml)             | 321 (168-575) (n=20)    | 153 (133-336) (n=3)      | 0.309   |
| Serum NGAL Time 3 (ng/ml)             | 226 (177-1158) (n=10)   | 213 (136-306) (n=4)      | 0.635   |
| Urinary NGAL/Ucr Time 1 (ng/ml)       | 510 (92-3079) (n=41)    | 33 (10-61) (n=27)        | <0.001  |
| Urinary NGAL/Ucr Time 2 (ng/ml)       | 459 (62-1832) (n=17)    | 109 (35-1173) (n=3)      | 0.689   |
| Urinary NGAL/Ucr Time 3 (ng/ml)       | 259 (34-900) (n=8)      | 43 (14-167) (n=4)        | 0.154   |
| Serum Cystatin C Time 1 (ng/ml)       | 1551 (801-2804)         | 713 (560-989)            | <0.001  |
| Serum Cystatin C Time 2 (ng/ml)       | 1358 (935-2598) (n=20)  | 974 (833-1318) (n=3)     | 0.309   |
| Serum Cystatin C Time 3 (ng/ml)       | 2206 (1097-2685) (n=10) | 940 (810-1766) (n=4)     | 0.106   |
| Urinary Cystatin C/Ucr Time 1 (ng/ml) | 280 (27-1299) (n=41)    | 53 (11-643)              | 0.113   |
| Urinary Cystatin C/Ucr Time 2 (ng/ml) | 247 (23-782) (n=17)     | 147 (63-1794) (n=3)      | 0.842   |
| Urinary Cystatin C/Ucr Time 3 (ng/ml) | 317 (69-1084) (n=7)     | 52 (49-56) (n=4)         | 0.073   |
| Urinary KIM-1/Ucr Time 1 (ng/ml)      | 4.3 (1.6-13.2) (n=41)   | 2.1 (1.4-5.5)            | 0.089   |
| Urinary KIM-1/Ucr Time 2 (ng/ml)      | 4.5 (2.1-7.3) (n=17)    | 4.1 (3.7-5.2) (n=3)      | 0.958   |
| Urinary KIM-1/Ucr Time 3 (ng/ml)      | 2.2 (1.7-6.0) (n=8)     | 2.9 (1.0-4.5) (n=4)      | 0.933   |
